# Supplementary material for: FABP4-mediated lipid accumulation and lipolysis in tumor-associated macrophages promote breast cancer metastasis
Source: eLife. 2024 Nov 8;13:RP101221. doi: 10.7554/eLife.101221 (PMC11548877; doi:10.7554/eLife.101221)
Supplement: Supplementary file 1. [file elife-101221-supp1.xlsx]

## Sheet: Breast Cancer IHC
Surgical No	Age	Vital status	BMI around diagnosis date	Histologic type	Tumor size (mm in greatest dimension)	Elston Ellis grade	Focality	Lymphovascular invasion	Metastasis	CD163 expression	FABP4 CD163 double possitive in tumor tissue	ER	PR	HER2	Surgery date	Sex
S21-029349	61	0	34.1	Ductal carcinoma in situ (DCIS)	22	2	1	0	0	507	0	1	1	0	2021-08-19 09:10:38	F
S21-003834	74	0	27.84	Ductal carcinoma in situ (DCIS)	24	3	1	0	0	1006	11	1	0	0	2021-02-03 09:10:49	F
S15-044642	94	1	24.48	Invasive ductal carcinoma	34	2	1	0	1 (distant)	2726	189	0	0	1	2015-12-30 09:56:19	F
S22-018337	68	0	38.45	Invasive ductal carcinoma	22	2	3	0	0	1390	47	1	1	0	2022-05-16 09:09:18	F
S22-003869	41	0	28.47	Invasive ductal carcinoma	6	2	1	0	0	704	40	1	0	0	2022-02-02 08:17:19	F
S21-002259	43	0	44.43	Invasive ductal carcinoma	4	3	14	0	0	826	69	0	0	1	2021-01-21 10:06:46	F
S19-046632	59	0	31.5	Invasive ductal carcinoma	8	2	1	0	0	500	11	1	1	0	2019-12-16 14:08:55	F
S19-043721	65	1	20.49	Invasive ductal carcinoma	7	2	2	0	0	529	0	1	0	0	2019-11-21 16:41:29	F
S16-018910	70	0	38.02	Invasive ductal carcinoma	11	2	1	0	0	121	11	1	1	0	2016-06-02 13:10:50	F
S21-007663	70	0	29.06	Invasive ductal carcinoma	18	2	1	0	1 (distant)	1730	266	1	1	0	2021-03-03 15:30:11	F
S19-044629	65	0	28.12	Invasive ductal carcinoma	12	2	1	0	0	1363	6	1	1	0	3/2/2019	F
S22-002010	74	0	24.05	Invasive ductal carcinoma	36	1	1	0	0	1191	0	1	1	0	2022-01-19 08:55:49	F
S21-037821	90	0	28.8	Invasive ductal carcinoma	7	3	1	0	0	887	40	1	1	0	2021-10-21 07:33:02	F
S21-035425	62	0	46.33	Invasive ductal carcinoma	22	2	1	0	0	468	12	1	0	0	2021-10-04 17:04:32	F
S21-034756	70	0	32.46	Invasive ductal carcinoma	8	3	1	0	0	369	1	1	1	0	2021-09-29 11:44:48	F
S21-031449	50	0	38.32	Invasive ductal carcinoma	18	1	3	0	0	845	10	1	1	0	2021-09-02 16:21:32	F
S21-019671	77	0	37.72	Invasive ductal carcinoma	14	2	1	0	0	302	64	1	1	0	2021-06-03 10:03:39	F
S21-018379	62	0	33.15	Invasive ductal carcinoma	11	1	1	0	0	214	4	1	0	0	2021-05-24 13:18:05	F
S21-016523	67	0	21.1	Invasive ductal carcinoma	4	2	1	0	0	651	105	1	1	0	2021-05-10 15:38:53	F
S21-010877	67	0	24.86	Invasive ductal carcinoma	14	2	1	0	0	417	87	1	1	0	2021-03-29 16:26:27	F
S21-010820	74	0	24.5	Invasive ductal carcinoma	28	3	1	1	1 (distant)	1109	260	1	1	0	2021-03-29 13:08:58	F
S21-006708	72	0	21.18	Invasive ductal carcinoma	3	1	1	0	0	1590	0	1	1	0	2021-02-25 09:52:45	F
S21-003116	87	0	26.57	Invasive ductal carcinoma	28	2	1	1	0	845	4	1	1	0	2021-01-28 09:31:25	F
S21-001242	55	0	24.07	Invasive ductal carcinoma	15	1	1	0	0	1108	204	1	1	0	2021-01-13 09:13:38	F
S21-002388	45	0	27.02	Invasive ductal carcinoma	6	3	1	0	0	1274	1	0	0	1	2021-01-21 16:59:19	F
S21-025047	64	0	28.64	Invasive ductal carcinoma with lobular features	22	2	1	1	1 (distant)	1516	101	1	1	0	2021-07-15 13:13:54	F
S21-035378	78	0	35.88	Invasive ductal carcinoma	41	1	1	0	0	289	56	1	1	0	2021-10-04 13:28:53	F
S21-034875	75	0	27.64	Invasive ductal carcinoma	3	2	1	0	1 (lymph node)	1147	52	1	0	0	2021-09-29 16:18:11	F
S21-025966	80	0	35.07	Invasive ductal carcinoma	21	1	1	0	0	350	20	1	1	0	2021-07-22 13:21:36	F
S21-009383	74	0	31.5	Invasive ductal carcinoma	35	2	1	1	0	1721	17	1	1	1	2021-03-17 09:15:32	F
S21-009132	77	0	25.54	Invasive ductal carcinoma	11	1	1	0	0	131	0	1	1	0	2021-03-15 11:52:00	F
S21-045706	76	0	31.2	Invasive ductal carcinoma	20	2	1	0	0	1976	113	1	1	0	2021-12-16 15:08:57	F
S21-004838	76	0	26.43	Invasive ductal carcinoma	10	2	1	0	0	123	5	1	0	0	2021-02-10 16:33:49	F
S16-041509	64	1	21.28	nvasive ductal carcinoma	10	3	1	1	0	287	143	1	0	0	2016-11-30 15:40:58	F
S19-047063	63	0	37.82	Invasive ductal carcinoma	20	3	1	0	1 (distant)	1694	197	0	0	0	2019-12-18	F
S20-004303	72	1	42	Invasive ductal carcinoma	9	2	1	0	1 (distant)	5911	238	1	1	0	2020-02-05	F
S20-039038	60	0	45.75	Invasive ductal carcinoma	13	3	1	0	0	3078	76	0	0	1	2020-12-10 09:08:11	F
S19-032010	56	1	35.84	Invasive ductal carcinoma	29	3	1	0	0	1449	326	0	0	0	2019-08-28 10:05:02	F
S19-022611	86	0	26.72	Invasive ductal carcinoma	10	3	1	0	0	170	29	0	0	0	2019-06-13 12:04:00	F
S19-000942	62	0	24.02	Invasive ductal carcinoma	6	1	1	0	0	731	59	0	0	0	2019-01-09 08:10:14	F
S17-040269	56	1	44.87	Invasive ductal carcinoma	11	3	1	1	1 (distant)	4799	187	0	0	0	2017-11-08 14:59:29	F
S17-038353	78	0	25.12	Invasive ductal carcinoma	13	1	1	0	0	203	10	0	0	1	2017-10-25 12:52:40	F
S17-032668	89	1	26.09	Invasive ductal carcinoma	11	2	1	0	0	1153	159	0	0	0	2017-09-14 12:31:15	F
S17-018660	70	0	31.22	Invasive ductal carcinoma	13	3	1	0	0	536	20	0	0	0	2017-05-25 12:30:51	F
S21-034720	64	0	22.72	Invasive lobular carcinoma	7	2	1	0	0	292	38	1	1	0	2021-09-29 09:25:49	F
S19-007268	70	0	23.52	Invasive lobular carcinoma	11	2	1	0	0	308	14	1	0	1	2019-02-26 10:23:46	F
S21-032090	84	0	42.53	Invasive lobular carcinoma	25	2	1	0	1 (distant)	1929	71	1	1	0	2021-09-09 13:18:48	F
S21-027730	59	0	32.56	Invasive lobular carcinoma	11	2	1	0	0	334	192	1	1	0	2021-08-05 12:07:00	F
S21-004814	72	0	30.71	Invasive lobular carcinoma	14	2	1	0	1 (lymph node)	736	10	1	1	0	2021-02-10 14:33:10	F
S21-034718	75	0	27.73	Residual invasive lobular carcinoma	5	1	1	0	0	30	28	1	1	0	2021-09-29 09:10:58	F
S21-038720	70	0	36.97	Invasive carcinoma of no special type (ductal)	6	3	1	0	1 (distant)	2040	133	1	1	0	2021-10-27 13:46:49	F
S21-004118	72	0	37.5	Invasive mammary carcinoma with mixed ductal and lobular features	9	1	1	0	0	1109	3	1	1	0	2021-02-04 14:18:11	F
S21-034044	68	0	20.46	Metaplastic carcinoma	50	2	1	0	1 (distant)	2485	325	0	0	0	2021-09-23 15:14:42	F
S19-039753	54	0	39.47	Metaplastic carcinoma	21	3	1	0	0	2911	64	0	0	0	2019-10-24 09:40:02	F
S16-044242	69	0	36.6	Metaplastic carcinoma	13	3	1	1	0	1605	117	0	0	0	2016-12-21 14:10:21	F
S21-043638	59	0	38.71	Invasive solid papillary carcinoma	34	2	1	0	1 (distant)	6056	55	1	1	0	2021-12-02 11:58:26	F
S21-012293	76	1	32.47	Invasive mucinous carcinoma	12	2	1	0	0	586	3	1	1	0	2021-04-08 10:44:43	F
S21-005884	85	0	32.01	Invasive tubular carcinoma	8	1	2	0	0	350	0	1	1	1	2021-02-18 13:35:01	F
S20-026043	73	1	34.54	Invasive solid papillary carcinoma	33	1	1	0	0	1887	84	1	1	0	2020-08-27 11:34:33	F
